# Supplementary material for: A Stochastic Step Model of Replicative Senescence Explains ROS Production Rate in Ageing Cell Populations
Source: PubMed Central journal article supplement (PMC3281103; doi:10.1371/journal.pone.0032117), 2012-02-16

**A**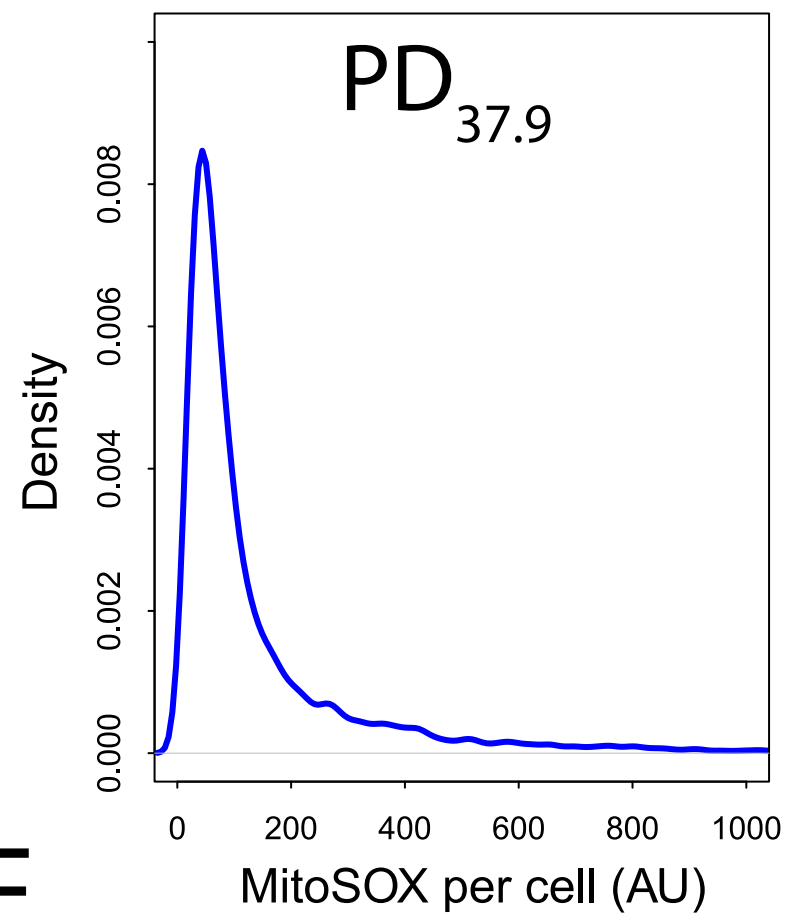**B**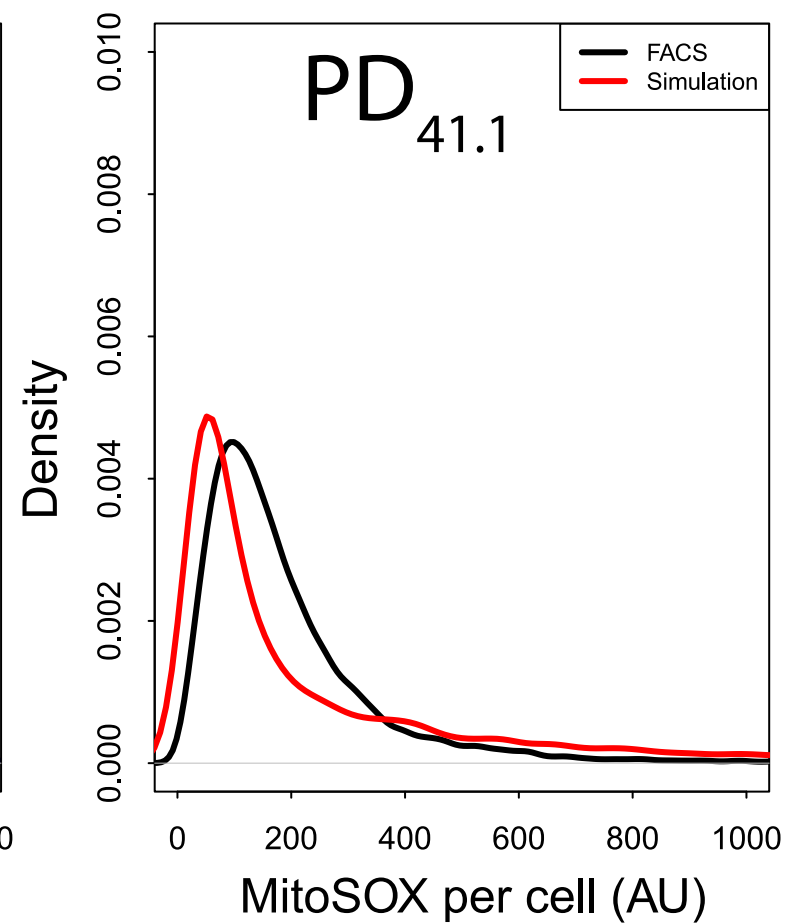**C**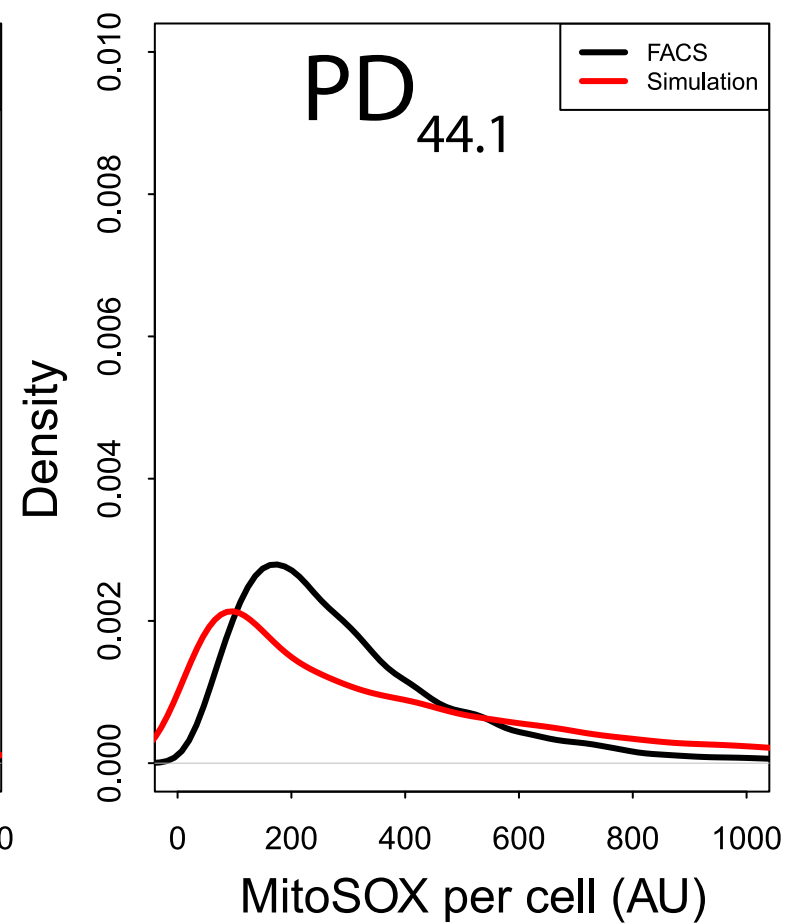**D**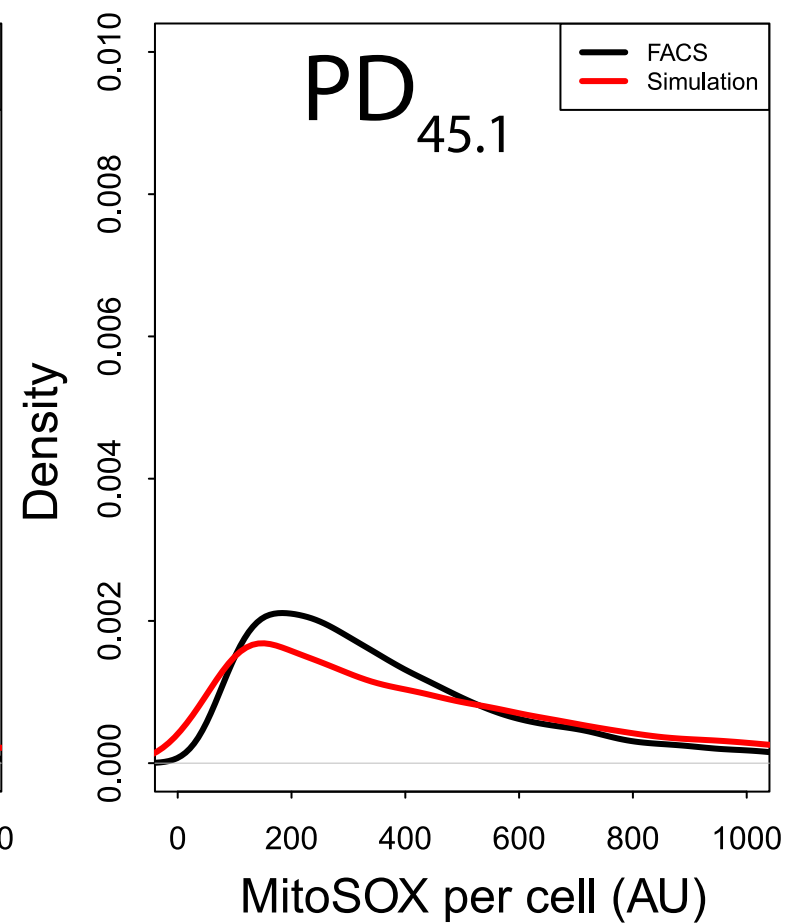**E**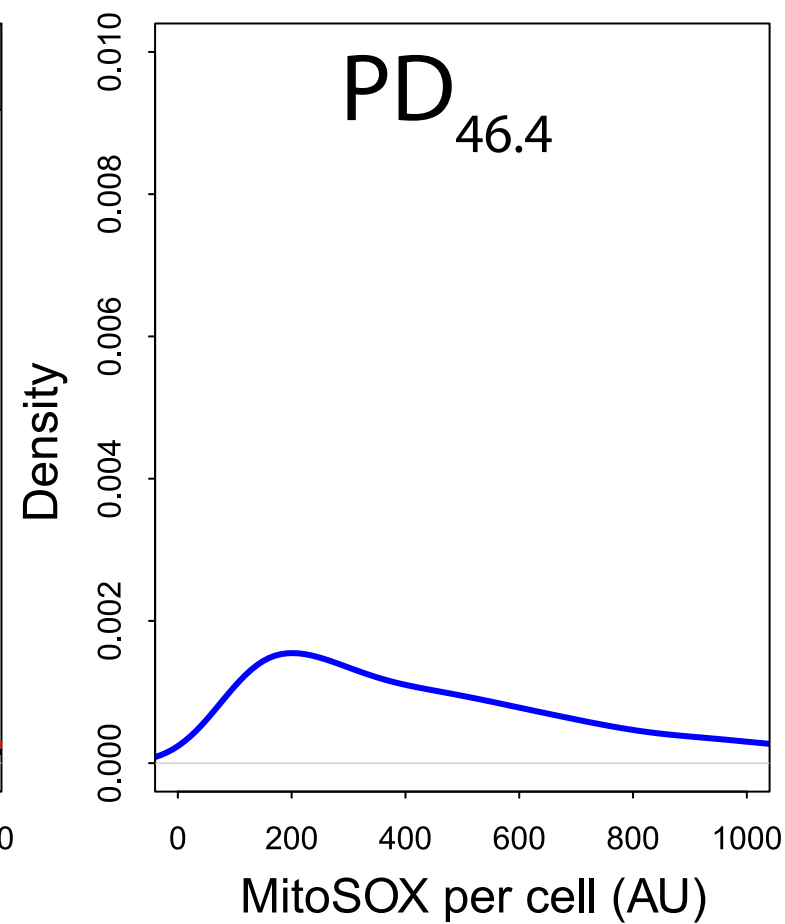**F**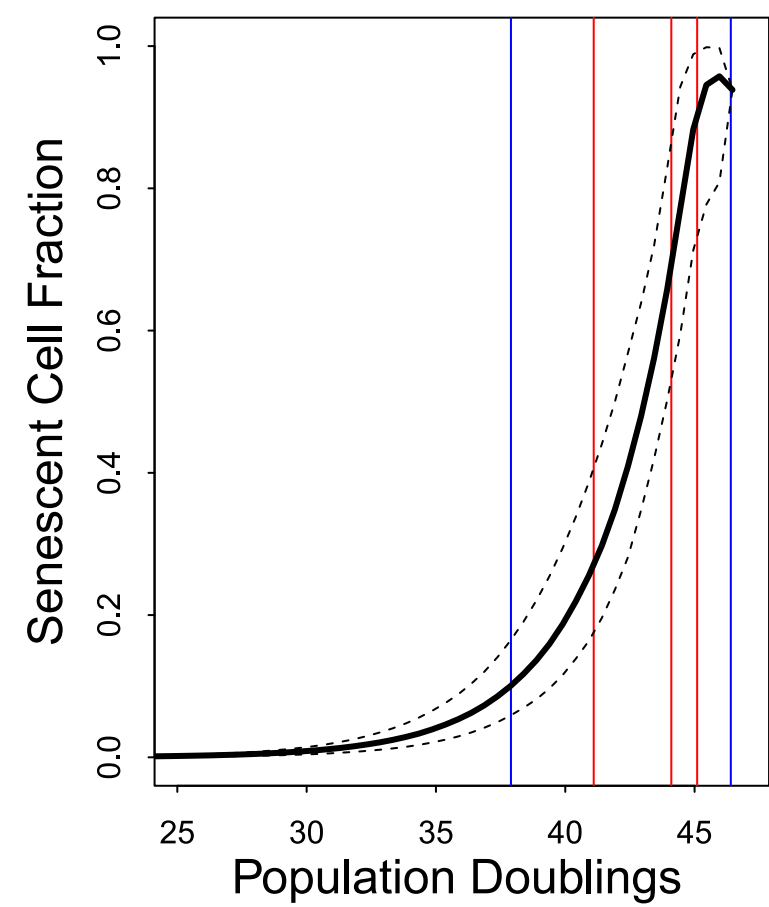

Supplement: pone.0032117.s002.pdf [file pone.0032117.s002.pdf]
